# Supplementary material for: Low temperature in situ Raman spectroscopy of an electro-generated arylbis(arylthio)sulfonium ion
Source: Royal Society of Chemistry journal article supplement (doi:10.1039/c5cc03585f), 2015-01-01
Supplement: c5cc03585f2.pdf [file c5cc03585f2.pdf]

ARS (Ar = *p*-FC<sub>6</sub>H<sub>4</sub>) Monomer Radical [neutral, doublet] at UB3LYP/6-311++G(2d,p).

| Mode No. | Frequency<br>cm <sup>-1</sup> | IR Intensity<br>10 <sup>-40</sup><br>esu <sup>2</sup> cm <sup>2</sup> | Raman<br>Activity<br>A <sup>2</sup> /AMU | Scaled Freq.<br>x0.98 | bond/group  | Assign<br>motion       | direction    | activity | type |
|----------|-------------------------------|-----------------------------------------------------------------------|------------------------------------------|-----------------------|-------------|------------------------|--------------|----------|------|
|          |                               |                                                                       |                                          |                       |             |                        |              |          |      |
| 1        | 111.8                         | 2.0                                                                   | 1.2                                      | 110                   | S-CCCC-F    | single bend            | out-of-plane |          | a    |
| 2        | 267.7                         | 1.3                                                                   | 2.2                                      | 262                   | C-C-S       | head-waving skew       | in-plane     |          | b    |
| 3        | 308.1                         | 0.5                                                                   | 1.0                                      | 302                   | S-CCCC-F    | dolphin kick           | out-of-plane |          | c    |
| 4        | 383.4                         | 5.7                                                                   | 16.4                                     | 376                   | S-CCCC-F    | ring squaring          | in-plane     | IR/Raman | d    |
| 5        | 397.4                         | 0.0                                                                   | 0.2                                      | 389                   | C-C-C       | skew                   | out-of-plane |          | e    |
| 6        | 423.2                         | 3.4                                                                   | 0.0                                      | 415                   | C-C-F       | tail-waving skew       | in-plane     |          | f    |
| 7        | 517.7                         | 15.5                                                                  | 1.5                                      | 507                   | C-C-C       | butterfly              | out-of-plane | IR       | g    |
| 8        | 638.4                         | 0.0                                                                   | 5.3                                      | 626                   | C-C-C       | ring squeeze           | in-plane     | Raman    | h    |
| 9        | 658.0                         | 12.9                                                                  | 9.6                                      | 645                   | C-S         | stretch                | in-plane     | IR/Raman | i    |
| 10       | 727.0                         | 0.0                                                                   | 0.2                                      | 712                   | C-C-C       | ring chairing          | out-of-plane |          | j    |
| 11       | 818.0                         | 0.0                                                                   | 0.0                                      | 802                   | C-C-H       | padding                | out-of-plane |          | k    |
| 12       | 835.1                         | 13.7                                                                  | 42.9                                     | 818                   | C-S/C-F     | ring squaring          | in-plane     | IR/Raman | l    |
| 13       | 856.7                         | 62.2                                                                  | 0.2                                      | 840                   | C-C-H       | zigzag bend            | out-of-plane | IR       | m    |
| 14       | 972.3                         | 0.0                                                                   | 0.0                                      | 953                   | C-C-H       | butterflying           | out-of-plane |          | n    |
| 15       | 978.5                         | 0.0                                                                   | 0.0                                      | 959                   | C-C-H       | crawling               | out-of-plane |          | o    |
| 16       | 1024.0                        | 2.0                                                                   | 1.6                                      | 1004                  | C-C         | ring triangularing     | in-plane     |          | p    |
| 17       | 1077.9                        | 32.0                                                                  | 20.4                                     | 1056                  | C-C/C-S     | stretch/ring breathing | in-plane     | IR/Raman | q    |
| 18       | 1112.8                        | 4.0                                                                   | 0.9                                      | 1091                  | C-C         | anti-sym ring defoem   | in-plane     |          | r    |
| 19       | 1175.9                        | 40.3                                                                  | 8.2                                      | 1152                  | C-C         | sym-ring defoem        | in-plane     | IR/Raman | s    |
| 20       | 1255.7                        | 153.4                                                                 | 15.2                                     | 1231                  | S-F         | stretch                | in-plane     | IR/Raman | t    |
| 21       | 1293.7                        | 0.1                                                                   | 1.4                                      | 1268                  | C-C/C-S     | 2-fold ring twist      | in-plane     |          | u    |
| 22       | 1313.1                        | 7.3                                                                   | 3.8                                      | 1287                  | C-C/C-F     | 1-fold ring twist      | in-plane     | IR       | v    |
| 23       | 1431.5                        | 7.1                                                                   | 1.3                                      | 1403                  | C-C         | ring defoem            | in-plane     | IR       | w    |
| 24       | 1496.9                        | 45.4                                                                  | 3.9                                      | 1467                  | C-C/C-F/C-S | ring defoem            | in-plane     | IR       | x    |
| 25       | 1576.1                        | 7.8                                                                   | 1.4                                      | 1545                  | C-C         | 2-fold ring twist      | in-plane     | IR       | y    |
| 26       | 1601.8                        | 213.9                                                                 | 123.8                                    | 1570                  | C-C/C-F     | ring squaring          | in-plane     | IR/Raman | z    |
| 27       | 3190.4                        | 1.1                                                                   | 20.2                                     | 3127                  | C-H         | stretch                | in-plane     | Raman    |      |
| 28       | 3191.3                        | 0.1                                                                   | 97.9                                     | 3127                  | C-H         | stretch                | in-plane     | Raman    |      |
| 29       | 3202.9                        | 0.5                                                                   | 14.0                                     | 3139                  | C-H         | stretch                | in-plane     | Raman    |      |
| 30       | 3204.7                        | 2.4                                                                   | 250.7                                    | 3141                  | C-H         | sym-stretch breathing  | in-plane     | Raman    |      |

\*Colours distinguish prominent Raman modes (yellow) or in-plane (green) or out-of-plane (orange) vibrational modes.

\*Type depicts each of the 26 vibrational modes other than four C-H stretching modes as a-z from low frequencies.
